# Supplementary material
Source: publisher figshare collection journal article supplement (https://frontiersin.figshare.com/ndownloader/files/14565878)
Supplement: Supplementary file 1 [file 14565878]

**Table S1.** Results from a negative binomial Generalised Linear Model used to test for effects of distance to moorings, distance from shore, location, and grain size on infaunal community composition. The results are the estimates for each the predictor variables, with those significant at α = 0.05 marked in bold.

| Term | Maldanidae | Scalibregmidae | Ostracod sp.1 | Orbiniidae | Ostracod sp. 3 |
| --- | --- | --- | --- | --- | --- |
| Distance from mooring | -0.01 | **0.03** | 0.1 | **0.16** | 0.02 |
| Distance from shore | -0.01 | **0.02** | -0.05 | -0.03 | -0.03 |
| Location | 2.12 | -11.29 | **-0.8** | **5.5** | **-14.98** |
| Grain size | -0.01 | 0 | -0.01 | 0.01 | 0 |
| Distance from mooring x Location | **-0.28** | **0** | **-0.33** | **-1.12** | 0.9 |
|  | Nematodes | Ostracod sp. 6 | Bivalve sp.1 | Syllidae | Amphipoda sp.1 |
| Distance from mooring | **-0.03** | -0.07 | -0.07 | -0.03 | 0 |
| Distance from shore | 0.02 | **0.04** | **0.02** | 0.03 | **0** |
| Location | **2.37** | -4.62 | **-4.14** | 0.18 | **2.85** |
| Grain size | 0 | 0 | -0.01 | **0.01** | 0.01 |
| Distance from mooring x Location | -0.01 | 0.35 | 0.16 | 0.08 | -0.11 |
|  | Nereididae | Nemerteans | Opheliidae | Anthuroidea | Pectinariidae sp. 2 |
| Distance from mooring | 0.08 | 0.02 | 0.01 | -0.05 | 0.03 |
| Distance from shore | **-0.03** | -0.02 | **-0.01** | **0.03** | -0.01 |
| Location | **3.88** | -0.72 | **2.79** | 0.21 | **-13.43** |
| Grain size | 0 | -0.01 | **0.01** | 0 | **0.02** |
| Distance from mooring x Location | -0.13 | -0.08 | -0.04 | 0.05 | -0.09 |
|  |  |  |  |  |  |
